# Supplementary material for: Robustness of the Krebs Cycle under Physiological Conditions and in Cancer: New Clues for Evaluating Metabolism-Modifying Drug Therapies
Source: MDPI journal article supplement (doi:10.3390/biomedicines10051199), 2022-05-22
Supplement: s1 [file s1]

# Supplementary Material

## Robustness of the Krebs cycle under physiological conditions and in cancer. New clues for evaluating metabolism-modifying drug therapies

Rafael Franco<sup>1,2,3\*</sup> and Joan Serrano-Marín<sup>2</sup>

<sup>1</sup> CiberNed. Network Center for Neurodegenerative diseases. National Spanish Health Institute Carlos III. Madrid. Spain. (rfranco123@gmail.com)

<sup>2</sup> Molecular Neurobiology laboratory. Department of Biochemistry and Molecular Biomedicine. Universitat de Barcelona. Barcelona. Spain.

<sup>3</sup> School of Chemistry. Universitat de Barcelona. Barcelona. Spain.

### CONTENTS

- Equations
- Table S1
- Table S2
- Table S3

## EQUATIONS

The citrate synthase reaction was settled as Equation 1 (Eq.1):

$$v1 = \frac{V_{max} * [Oxa] * [ACoA]}{K_m(Oxa) * K_m(ACoA) + [Oxa] * K_m(ACoA) + [ACoA] * K_m(Oxa) + [Oxa] * [ACoA]} \quad (\text{Eq. 1})$$

The Aconitase reactions was settled as:

$$v2 = \frac{\frac{V_f * [Cit]}{K_m(Cit)} - \frac{V_r * [Isocit]}{K_m(Isocit)}}{1 + \frac{[Cit]}{K_m(Cit)} + \frac{[Isocit]}{K_m(Isocit)}} \quad (\text{Eq. 2})$$

The Isocitrate DH reaction was settled as:

$$v3 = \frac{V_{max} * [Isocit] * [NAD+]}{K_m(Isocit) * K_m(NAD+) + [Isocit] * K_m(NAD+) + [NAD+] * K_m(Isocit) + [Isocit] * [NAD+]} \quad (\text{Eq. 3})$$

The Alpha-Ketoglutarate DH was settled as:

$$v4 = \frac{V_{max} * [\alpha KG]}{K_m(Isocit) * K_m(NAD+) + [Isocit] * K_m(NAD+) + [NAD+] * K_m(Isocit) + [Isocit] * [NAD+]} \quad (\text{Eq. 4})$$

The Succinyl-CoA synthetase reaction was settled as:

$$v5 = \frac{\frac{V_f * [SCoA]}{K_m(SCoA)} - \frac{V_r * [Suc]}{K_m(Suc)}}{1 + \frac{[SCoA]}{K_m(SCoA)} + \frac{[Suc]}{K_m(Suc)}} \quad (\text{Eq. 5})$$

The Succinate DH reaction was settled as:

$$v6 = \frac{\frac{V_f * [Suc]}{K_m(Suc)} - \frac{V_r * [Fum]}{K_m(Fum)}}{1 + \frac{[Suc]}{K_m(Suc)} + \frac{[Fum]}{K_m(Fum)} * 1 + \frac{[Fum]}{K_i(Fum)}} \quad (\text{Eq. 6})$$

The Fumarate Hydratase reaction was settled as:

$$v7 = \frac{\frac{V_f * [Fum]}{K_m(Fum)} - \frac{V_r * [Mal]}{K_m(Mal)}}{1 + \frac{[Fum]}{K_m(Fum)} + \frac{[Mal]}{K_m(Mal)}} \quad (\text{Eq. 7})$$

The Malate DH reaction was settled as:

$$v8 = \frac{Vf * [mal] * [NAD+] - \frac{[Oxa] * [NADH]}{K_{eq}}}{[mal] * [NAD+] + Km(NAD+) * [mal] + [NAD+] * 1 + \frac{[NADH]}{Ki(NADH)} + \frac{Vf}{Vf - \frac{0.046}{K_{eq}}} * Km(NADH) * [Oxa] * 1 + \frac{[mal]}{Ki(mal)} + [NADH] * (Km(oxa) + [oxa])} \quad (\text{Eq. 8})$$

The input reaction was settled as:

$$v9 = \frac{(Vmax * [glut] * [NAD+])}{Km(glut) * Km(NAD+) + [glut] * Km(NAD+) + [NAD+] * Km(glut) + [glut] * [NAD+]} \quad (\text{Eq. 9})$$

The output reaction was settled as:

$$v10 = \frac{(Vmax * [cit] * [NAD+])}{Km(cit) * Km(NAD+) + [cit] * Km(NAD+) + [NAD+] * Km(cit) + [cit] * [NAD+]} \quad (\text{Eq. 10})$$

**Table S1.** Reaction fluxes (in RU) and metabolite concentrations (in mM) in different conditions of a “linear” Krebs’s cycle. The fluxes of each enzyme are indicated for the different conditions. In the first column is indicated the Basal (initial conditions), later the following abbreviations have been used. V1: citrate synthase (CS); V2; Aconitase (Aco); V3 isocitrate dehydrogenase (IDH); V4:  $\alpha$ -ketoglutarate dehydrogenase ( $\alpha$ KDH); V5: succinyl-CoA synthetase (SuS); V6: succinate dehydrogenase; (SDH); V7: fumarase (FH); V8: malate dehydrogenase (MDH); Intermediates: cit: citrate; akg:  $\alpha$ -ketoglutarate; suc: succinate.

| Fluxes through every step |                           |          |          |          |                         |          |                         |          |          |              |                             |                             |                         |           |           |           |             |             |             |             |                  |                                 |
|---------------------------|---------------------------|----------|----------|----------|-------------------------|----------|-------------------------|----------|----------|--------------|-----------------------------|-----------------------------|-------------------------|-----------|-----------|-----------|-------------|-------------|-------------|-------------|------------------|---------------------------------|
|                           | Enzyme activity variation |          |          |          |                         |          |                         |          |          |              |                             |                             | Concentration variation |           |           |           |             |             |             |             |                  |                                 |
|                           | Control                   | V1<br>x5 | V1<br>/5 | V4<br>x5 | V4<br>/5 <sup>(a)</sup> | V5<br>x5 | V5<br>/5 <sup>(a)</sup> | V6<br>x5 | V6<br>/5 | (V1,5)<br>x5 | (V1,5)<br>/5 <sup>(a)</sup> | (V4,6)<br>x5 <sup>(a)</sup> | cit<br>x2               | cit<br>/2 | akg<br>x2 | akg<br>/2 | akg<br>x100 | akg<br>/100 | suc<br>x100 | suc<br>/100 | (akg, cit)<br>x2 | (akg, cit)<br>/2 <sup>(a)</sup> |
| CS                        | 100.00                    | 500.00   | 20.00    | 100.00   | 100.00                  | 100.00   | 100.00                  | 100.00   | 100.00   | 500.00       | 20.00                       | 100.00                      | 100.00                  | 100.00    | 100.00    | 100.00    | 100.00      | 100.00      | 100.00      | 100.00      | 100.00           | 100.00                          |
| Aco                       | 100.00                    | 100.00   | 100.00   | 100.00   | 100.00                  | 100.00   | 100.00                  | 100.00   | 100.00   | 100.00       | 100.00                      | 100.00                      | 131.85                  | 70.70     | 100.00    | 100.00    | 100.00      | 100.00      | 100.00      | 100.00      | 131.85           | 70.70                           |
| IDH                       | 100.00                    | 100.00   | 100.00   | 100.00   | 100.00                  | 100.00   | 100.00                  | 100.00   | 100.00   | 100.00       | 100.00                      | 100.00                      | 131.85                  | 70.70     | 100.00    | 100.00    | 100.00      | 100.00      | 100.00      | 100.00      | 131.85           | 70.70                           |
| $\alpha$ KDH              | 100.00                    | 100.00   | 100.00   | 100.00   | 32.50                   | 100.00   | 100.00                  | 100.00   | 100.00   | 100.00       | 100.00                      | 100.00                      | 131.85                  | 70.70     | 100.00    | 100.00    | 100.00      | 100.00      | 100.00      | 100.00      | 131.85           | 70.70                           |
| SuS                       | 100.00                    | 100.00   | 100.00   | 100.00   | 32.50                   | 100.00   | 37.82                   | 100.00   | 100.00   | 100.00       | 37.82                       | 100.00                      | 123.80                  | 70.70     | 100.00    | 100.00    | 100.00      | 100.00      | 100.00      | 100.00      | 123.80           | 70.70                           |
| SDH                       | 100.00                    | 100.00   | 100.00   | 100.00   | 32.50                   | 100.00   | 37.82                   | 100.00   | 100.00   | 100.00       | 37.82                       | 100.00                      | 102.80                  | 70.70     | 100.00    | 100.00    | 100.00      | 100.00      | 100.00      | 100.00      | 102.80           | 70.70                           |
| FH                        | 100.00                    | 100.00   | 100.00   | 100.00   | 32.50                   | 100.00   | 37.82                   | 100.00   | 100.00   | 100.00       | 37.82                       | 100.00                      | 102.80                  | 70.70     | 100.00    | 100.00    | 100.00      | 100.00      | 100.00      | 100.00      | 102.80           | 70.70                           |
| MDH                       | 100.00                    | 100.00   | 100.00   | 100.00   | 32.50                   | 100.00   | 37.82                   | 100.00   | 100.00   | 100.00       | 37.82                       | 100.00                      | 102.80                  | 70.70     | 100.00    | 100.00    | 100.00      | 100.00      | 100.00      | 100.00      | 102.80           | 70.70                           |

| Intermediate concentrations |                           |          |          |          |                         |          |                         |          |          |              |                             |              |                          |           |           |           |             |             |             |             |                                 |                                 |
|-----------------------------|---------------------------|----------|----------|----------|-------------------------|----------|-------------------------|----------|----------|--------------|-----------------------------|--------------|--------------------------|-----------|-----------|-----------|-------------|-------------|-------------|-------------|---------------------------------|---------------------------------|
|                             | Enzyme activity variation |          |          |          |                         |          |                         |          |          |              |                             |              | Concentration variation  |           |           |           |             |             |             |             |                                 |                                 |
|                             | Control                   | V1<br>x5 | V1<br>/5 | V4<br>x5 | V4<br>/5 <sup>(a)</sup> | V5<br>x5 | V5<br>/5 <sup>(a)</sup> | V6<br>x5 | V6<br>/5 | (V1,5)<br>x5 | (V1,5)<br>/5 <sup>(a)</sup> | (V4,6)<br>x5 | cit<br>x2 <sup>(a)</sup> | cit<br>/2 | akg<br>x2 | akg<br>/2 | akg<br>x100 | akg<br>/100 | Suc<br>x100 | Suc<br>/100 | (akg, cit)<br>x2 <sup>(a)</sup> | (akg, cit)<br>/2 <sup>(a)</sup> |
| [icit]                      | 0.04                      | 0.04     | 0.04     | 0.04     | 0.04                    | 0.04     | 0.04                    | 0.04     | 0.04     | 0.04         | 0.04                        | 0.04         | 0.05                     | 0.03      | 0.04      | 0.04      | 0.04        | 0.04        | 0.04        | 0.04        | 0.05                            | 0.03                            |
| [akg]                       | 0.32                      | 0.32     | 0.32     | 0.03     | 67501.40                | 0.32     | 0.32                    | 0.32     | 0.32     | 0.32         | 0.32                        | 0.03         | 0.86                     | 0.15      | 0.32      | 0.32      | 0.32        | 0.32        | 0.32        | 0.32        | 0.86                            | 0.15                            |
| [sca]                       | 0.23                      | 0.23     | 0.23     | 0.23     | 0.02                    | 0.03     | 62178.2                 | 0.13     | 1.02     | 0.03         | 62178.20                    | 0.13         | 8047.89                  | 0.05      | 0.23      | 0.23      | 0.23        | 0.23        | 0.23        | 0.23        | 8047.97                         | 0.05                            |
| [suc]                       | 0.57                      | 0.57     | 0.57     | 0.57     | 0.001                   | 0.57     | 0                       | 0.15     | 3.96     | 0.57         | 0.001                       | 0.15         | 20986.80                 | 0.004     | 0.57      | 0.57      | 0.57        | 0.57        | 0.57        | 0.57        | 20987.00                        | 0.004                           |
| [fum]                       | 1.30                      | 1.30     | 1.30     | 1.30     | 0.01                    | 1.3      | 0.01                    | 1.3      | 1.3      | 1.30         | 0.01                        | 1.30         | 16.53                    | 0.04      | 1.30      | 1.30      | 1.30        | 1.30        | 1.30        | 1.30        | 16.53                           | 0.04                            |
| [mal]                       | 4.00                      | 4.00     | 4.00     | 4.00     | 0.09                    | 4        | 0.11                    | 4        | 4        | 4.00         | 0.11                        | 4.00         | 9.36                     | 0.41      | 4.00      | 4.00      | 4.00        | 4.00        | 4.00        | 4.00        | 9.36                            | 0.41                            |
| [oxa]                       | 0.01                      | 0.01     | 0.01     | 0.01     | 0.01                    | 0.01     | 0.01                    | 0.01     | 0.01     | 0.01         | 0.01                        | 0.01         | 0.01                     | 0.01      | 0.01      | 0.01      | 0.01        | 0.01        | 0.01        | 0.01        | 0.01                            | 0.01                            |

(a) no SS is reached in these conditions

**Table S2.** Reaction fluxes (in RU) and metabolite concentrations (in mM) in different conditions of the closed TAC model. The fluxes of each enzyme are indicated for the different conditions. In the first column is indicated the Basal (initial conditions), later the following abbreviations have been used. V1: citrate synthase; V4:  $\alpha$ -ketoglutarate dehydrogenase; V5: succinyl-CoA synthetase ;V6: succinate dehydrogenase; cit: citrate; akg:  $\alpha$ -Ketoglutarate; suc: succinate.

| Fluxes through every step |                           |          |          |          |          |          |          |          |          |              |              |              |                         |           |           |           |             |             |             |             |                  |                  |
|---------------------------|---------------------------|----------|----------|----------|----------|----------|----------|----------|----------|--------------|--------------|--------------|-------------------------|-----------|-----------|-----------|-------------|-------------|-------------|-------------|------------------|------------------|
|                           | Enzyme activity variation |          |          |          |          |          |          |          |          |              |              |              | Concentration variation |           |           |           |             |             |             |             |                  |                  |
|                           | Control                   | V1<br>x5 | V1<br>/5 | V4<br>x5 | V4<br>/5 | V5<br>x5 | V5<br>/5 | V6<br>x5 | V6<br>/5 | (V1,5)<br>x5 | (V1,5)<br>/5 | (V4,6)<br>x5 | cit<br>x2               | cit<br>/2 | akg<br>x2 | akg<br>/2 | akg<br>x100 | akg<br>/100 | Suc<br>x100 | Suc<br>/100 | (akg, cit)<br>x2 | (akg, cit)<br>/2 |
| CS                        | 100.00                    | 101.60   | 29.70    | 100.26   | 31.50    | 100.19   | 37.3     | 100.63   | 98.11    | 101.71       | 29.61        | 100.90       | 100.33                  | 99.80     | 100.28    | 99.84     | 102.64      | 99.66       | 102.77      | 99.34       | 100.55           | 99.62            |
| Aco                       | 100.00                    | 101.60   | 29.70    | 100.26   | 31.50    | 100.19   | 37.3     | 100.63   | 98.11    | 101.71       | 29.61        | 100.90       | 100.33                  | 99.80     | 100.28    | 99.84     | 102.64      | 99.66       | 102.77      | 99.34       | 100.55           | 99.62            |
| IDH                       | 100.00                    | 101.60   | 29.70    | 100.26   | 31.50    | 100.19   | 37.3     | 100.63   | 98.11    | 101.71       | 29.61        | 100.90       | 100.33                  | 99.80     | 100.28    | 99.84     | 102.64      | 99.66       | 102.77      | 99.34       | 100.55           | 99.62            |
| $\alpha$ KDH              | 100.00                    | 101.60   | 29.70    | 100.26   | 31.50    | 100.19   | 37.3     | 100.63   | 98.11    | 101.71       | 29.61        | 100.90       | 100.33                  | 99.80     | 100.28    | 99.84     | 102.64      | 99.66       | 102.77      | 99.34       | 100.55           | 99.62            |
| SuS                       | 100.00                    | 101.60   | 29.70    | 100.26   | 31.50    | 100.19   | 37.3     | 100.63   | 98.11    | 101.71       | 29.61        | 100.90       | 100.33                  | 99.80     | 100.28    | 99.84     | 102.64      | 99.66       | 102.77      | 99.34       | 100.55           | 99.62            |
| SDH                       | 100.00                    | 101.60   | 29.70    | 100.26   | 31.50    | 100.19   | 37.3     | 100.63   | 98.11    | 101.71       | 29.61        | 100.90       | 100.33                  | 99.80     | 100.28    | 99.84     | 102.64      | 99.66       | 102.77      | 99.34       | 100.55           | 99.62            |
| FH                        | 100.00                    | 101.60   | 29.70    | 100.26   | 31.50    | 100.19   | 37.3     | 100.63   | 98.11    | 101.71       | 29.61        | 100.90       | 100.33                  | 99.80     | 100.28    | 99.84     | 102.64      | 99.66       | 102.77      | 99.34       | 100.55           | 99.62            |
| MDH                       | 100.00                    | 101.60   | 29.70    | 100.26   | 31.50    | 100.19   | 37.3     | 100.63   | 98.11    | 101.71       | 29.61        | 100.90       | 100.33                  | 99.80     | 100.28    | 99.84     | 102.64      | 99.66       | 102.77      | 99.34       | 100.55           | 99.62            |

| Intermediate concentrations |                           |          |          |          |          |          |          |          |          |              |              |              |                         |           |           |           |             |             |             |             |                  |                  |
|-----------------------------|---------------------------|----------|----------|----------|----------|----------|----------|----------|----------|--------------|--------------|--------------|-------------------------|-----------|-----------|-----------|-------------|-------------|-------------|-------------|------------------|------------------|
|                             | Enzyme activity variation |          |          |          |          |          |          |          |          |              |              |              | Concentration variation |           |           |           |             |             |             |             |                  |                  |
|                             | Control                   | V1<br>x5 | V1<br>/5 | V4<br>x5 | V4<br>/5 | V5<br>x5 | V5<br>/5 | V6<br>x5 | V6<br>/5 | (V1,5)<br>x5 | (V1,5)<br>/5 | (V4,6)<br>x5 | cit<br>x2               | cit<br>/2 | akg<br>x2 | akg<br>/2 | akg<br>x100 | akg<br>/100 | Suc<br>x100 | Suc<br>/100 | (akg, cit)<br>x2 | (akg, cit)<br>/2 |
| [cit]                       | 0.38                      | 0.39     | 0.05     | 0.38     | 0.05     | 0.38     | 0.07     | 0.39     | 0.36     | 0.39         | 0.05         | 0.39         | 0.38                    | 0.38      | 0.38      | 0.38      | 0.40        | 0.38        | 0.40        | 0.37        | 0.38             | 0.38             |
| [icit]                      | 0.04                      | 0.04     | 0.01     | 0.04     | 0.01     | 0.04     | 0.01     | 0.04     | 0.04     | 0.04         | 0.01         | 0.04         | 0.04                    | 0.04      | 0.04      | 0.04      | 0.04        | 0.04        | 0.04        | 0.04        | 0.04             | 0.04             |
| [akg]                       | 0.32                      | 0.33     | 0.04     | 0.03     | 6.29     | 0.32     | 0.06     | 0.33     | 0.3      | 0.33         | 0.04         | 0.03         | 0.32                    | 0.32      | 0.32      | 0.32      | 0.34        | 0.32        | 0.34        | 0.31        | 0.32             | 0.32             |
| [sca]                       | 0.23                      | 0.39     | 0.02     | 0.26     | 0.02     | 0.04     | 6.11     | 0.15     | 0.37     | 0.07         | 0.31         | 0.16         | 0.26                    | 0.21      | 0.26      | 0.22      | 5.32        | 0.20        | 9.90        | 0.19        | 0.30             | 0.20             |
| [suc]                       | 0.57                      | 1.20     | 0.002    | 0.68     | 0.001    | 0.65     | 0.001    | 0.22     | 1.23     | 1.38         | 0.002        | 0.26         | 0.71                    | 0.51      | 0.69      | 0.52      | 21.16       | 0.46        | 39.61       | 0.39        | 0.83             | 0.45             |
| [fum]                       | 1.30                      | 1.91     | 0.03     | 1.42     | 0.01     | 1.39     | 0.01     | 1.64     | 0.78     | 2.04         | 0.03         | 1.84         | 1.46                    | 1.22      | 1.43      | 1.23      | 6.87        | 1.17        | 8.57        | 1.06        | 1.59             | 1.15             |
| [mal]                       | 4.00                      | 2.58     | 6.64     | 4.04     | 0.46     | 4.03     | 0.58     | 4.09     | 3.76     | 2.58         | 6.35         | 4.12         | 4.04                    | 3.97      | 4.04      | 3.98      | 4.38        | 3.95        | 4.40        | 3.91        | 4.07             | 3.95             |
| [oxa]                       | 0.01                      | 0.001    | 0.05     | 0.01     | 0.001    | 0.01     | 0.001    | 0.01     | 0.01     | 0.001        | 0.05         | 0.01         | 0.01                    | 0.01      | 0.01      | 0.01      | 0.01        | 0.01        | 0.01        | 0.01        | 0.01             | 0.01             |

**Table S3.** Reaction fluxes (in RU) and metabolite concentrations (in mM) in different conditions of the open Krebs' cycle model. The fluxes of each enzyme are indicated for the different conditions. In the first column is indicated the Basal (initial conditions), later the following abbreviations have been used. V1: citrate synthase; V4:  $\alpha$ -ketoglutarate dehydrogenase; V5: succinyl-CoA synthetase ;V6: succinate dehydrogenase; cit: citrate;  $\alpha$ kg:  $\alpha$ -ketoglutarate; suc: succinate.

| Fluxes through every step |                           |          |                         |          |                         |          |                         |          |          |              |                             |              |                         |           |           |           |             |             |             |             |                  |                  |
|---------------------------|---------------------------|----------|-------------------------|----------|-------------------------|----------|-------------------------|----------|----------|--------------|-----------------------------|--------------|-------------------------|-----------|-----------|-----------|-------------|-------------|-------------|-------------|------------------|------------------|
|                           | Enzyme activity variation |          |                         |          |                         |          |                         |          |          |              |                             |              | Concentration variation |           |           |           |             |             |             |             |                  |                  |
|                           | Control                   | V1<br>x5 | V1<br>/5 <sup>(a)</sup> | V4<br>x5 | V4<br>/5 <sup>(a)</sup> | V5<br>x5 | V5<br>/5 <sup>(a)</sup> | V6<br>x5 | V6<br>/5 | (V1,5)<br>x5 | (V1,5)<br>/5 <sup>(a)</sup> | (V4,6)<br>x5 | cit<br>x2               | cit<br>/2 | akg<br>x2 | akg<br>/2 | akg<br>x100 | akg<br>/100 | Suc<br>x100 | Suc<br>/100 | (akg, cit)<br>x2 | (akg, cit)<br>/2 |
| CS                        | 100.00                    | 100.00   | 31.79                   | 100.00   | 32.20                   | 100.00   | 37.82                   | 100.00   | 100.00   | 100.00       | 31.79                       | 100.00       | 100.00                  | 100.00    | 100.00    | 100.00    | 100.00      | 100.00      | 100.00      | 100.00      | 100.00           | 100.00           |
| Aco                       | 80.00                     | 80.00    | 27.86                   | 80.00    | 28.20                   | 80.00    | 32.88                   | 80.00    | 80.00    | 80.00        | 27.85                       | 80.00        | 80.00                   | 80.00     | 80.00     | 80.00     | 80.00       | 80.00       | 80.00       | 80.00       | 80.00            | 80.00            |
| IDH                       | 80.00                     | 80.00    | 27.86                   | 80.00    | 28.20                   | 80.00    | 32.88                   | 80.00    | 80.00    | 80.00        | 27.85                       | 80.00        | 80.00                   | 80.00     | 80.00     | 80.00     | 80.00       | 80.00       | 80.00       | 80.00       | 80.00            | 80.00            |
| $\alpha$ KDH              | 100.00                    | 100.00   | 47.86                   | 100.00   | 32.20                   | 100.00   | 52.88                   | 100.00   | 100.00   | 100.00       | 47.85                       | 100.00       | 100.00                  | 100.00    | 100.00    | 100.00    | 100.00      | 100.00      | 100.00      | 100.00      | 100.00           | 100.00           |
| SuS                       | 100.00                    | 100.00   | 46.66                   | 100.00   | 32.20                   | 100.00   | 37.82                   | 100.00   | 100.00   | 100.00       | 37.68                       | 100.00       | 100.00                  | 100.00    | 100.00    | 100.00    | 100.00      | 100.00      | 100.00      | 100.00      | 100.00           | 100.00           |
| SDH                       | 100.00                    | 100.00   | 31.79                   | 100.00   | 32.20                   | 100.00   | 37.82                   | 100.00   | 100.00   | 100.00       | 37.12                       | 100.00       | 100.00                  | 100.00    | 100.00    | 100.00    | 100.00      | 100.00      | 100.00      | 100.00      | 100.00           | 100.00           |
| FH                        | 100.00                    | 100.00   | 31.79                   | 100.00   | 32.20                   | 100.00   | 37.82                   | 100.00   | 100.00   | 100.00       | 37.09                       | 100.00       | 100.00                  | 100.00    | 100.00    | 100.00    | 100.00      | 100.00      | 100.00      | 100.00      | 100.00           | 100.00           |
| MDH                       | 100.00                    | 100.00   | 31.79                   | 100.00   | 32.20                   | 100.00   | 37.82                   | 100.00   | 100.00   | 100.00       | 31.79                       | 100.00       | 100.00                  | 100.00    | 100.00    | 100.00    | 100.00      | 100.00      | 100.00      | 100.00      | 100.00           | 100.00           |
| Output                    | 20.00                     | 20.00    | 3.93                    | 20.00    | 4.00                    | 20.00    | 4.94                    | 20.00    | 20.00    | 20.00        | 3.93                        | 20.00        | 20.00                   | 20.00     | 20.00     | 20.00     | 20.00       | 20.00       | 20.00       | 20.00       | 20.00            | 20.00            |
| Input                     | 20.00                     | 20.00    | 20.00                   | 20.00    | 20.00                   | 20.00    | 20.00                   | 20.00    | 20.00    | 20.00        | 20.00                       | 20.00        | 20.00                   | 20.00     | 20.00     | 20.00     | 20.00       | 20.00       | 20.00       | 20.00       | 20.00            | 20.00            |

| Intermediate concentrations |                           |          |                         |          |                         |          |                         |          |          |              |                             |              |                         |           |           |           |             |             |             |             |                  |                  |
|-----------------------------|---------------------------|----------|-------------------------|----------|-------------------------|----------|-------------------------|----------|----------|--------------|-----------------------------|--------------|-------------------------|-----------|-----------|-----------|-------------|-------------|-------------|-------------|------------------|------------------|
|                             | Enzyme activity variation |          |                         |          |                         |          |                         |          |          |              |                             |              | Concentration variation |           |           |           |             |             |             |             |                  |                  |
|                             | Control                   | V1<br>x5 | V1<br>/5 <sup>(a)</sup> | V4<br>x5 | V4<br>/5 <sup>(a)</sup> | V5<br>x5 | V5<br>/5 <sup>(a)</sup> | V6<br>x5 | V6<br>/5 | (V1,5)<br>x5 | (V1,5)<br>/5 <sup>(a)</sup> | (V4,6)<br>x5 | cit<br>x2               | cit<br>/2 | akg<br>x2 | akg<br>/2 | akg<br>x100 | akg<br>/100 | Suc<br>x100 | Suc<br>/100 | (akg, cit)<br>x2 | (akg, cit)<br>/2 |
| [cit]                       | 0.38                      | 0.38     | 0.06                    | 0.38     | 0.06                    | 0.38     | 0.08                    | 0.38     | 0.38     | 0.38         | 0.06                        | 0.38         | 0.38                    | 0.38      | 0.38      | 0.38      | 0.38        | 0.38        | 0.38        | 0.38        | 0.38             | 0.38             |
| [icit]                      | 0.04                      | 0.04     | 0.01                    | 0.04     | 0.01                    | 0.04     | 0.02                    | 0.04     | 0.04     | 0.04         | 0.01                        | 0.04         | 0.04                    | 0.04      | 0.04      | 0.04      | 0.04        | 0.04        | 0.04        | 0.04        | 0.04             | 0.04             |
| [ $\alpha$ kg]              | 0.32                      | 0.32     | 0.08                    | 0.03     | 16005.70                | 0.32     | 0.10                    | 0.32     | 0.32     | 0.32         | 0.08                        | 0.03         | 0.32                    | 0.32      | 0.32      | 0.32      | 0.32        | 0.32        | 0.32        | 0.32        | 0.32             | 0.32             |
| [sca]                       | 0.23                      | 0.17     | 11009.80                | 0.23     | 0.02                    | 0.03     | 15067.30                | 0.13     | 1.02     | 0.02         | 10077.50                    | 0.13         | 0.23                    | 0.23      | 0.23      | 0.23      | 0.23        | 0.23        | 0.23        | 0.23        | 0.23             | 0.23             |
| [suc]                       | 0.57                      | 0.32     | 136296.00               | 0.57     | 0.001                   | 0.57     | 0.001                   | 0.15     | 3.96     | 0.32         | 191.45                      | 0.15         | 0.57                    | 0.57      | 0.57      | 0.57      | 0.57        | 0.57        | 0.57        | 0.57        | 0.57             | 0.57             |
| [fum]                       | 1.30                      | 0.95     | 53.63                   | 1.30     | 0.01                    | 1.30     | 0.01                    | 1.30     | 1.30     | 0.95         | 28.28                       | 1.30         | 1.30                    | 1.30      | 1.30      | 1.30      | 1.30        | 1.30        | 1.30        | 1.30        | 1.30             | 1.30             |
| [mal]                       | 4.00                      | 2.47     | 13308.90                | 4.00     | 0.47                    | 4.00     | 0.59                    | 4.00     | 4.00     | 2.47         | 5771.47                     | 4.00         | 4.00                    | 4.00      | 4.00      | 4.00      | 4.00        | 4.00        | 4.00        | 4.00        | 4.00             | 4.00             |
| [oxa]                       | 0.01                      | 0.001    | 7.85                    | 0.01     | 0.001                   | 0.01     | 0.001                   | 0.01     | 0.01     | 0.001        | 7.15                        | 0.01         | 0.01                    | 0.01      | 0.01      | 0.01      | 0.01        | 0.01        | 0.01        | 0.01        | 0.01             | 0.01             |

(a) no SS is reached in these condition
